# Supplementary material for: In Vitro Investigations of Human Bioaccessibility from Reference Materials Using Simulated Lung Fluids
Source: PubMed Central journal article supplement (PMC5334666; doi:10.3390/ijerph14020112), 2017-01-24
Supplement: ijerph-14-00112-s001.pdf [file ijerph-14-00112-s001.pdf]

## Supplementary Materials: In Vitro Investigations of Human Bioaccessibility from Reference Materials Using Simulated Lung Fluids

Aurélie Pelfrène, Mark R. Cave, Joanna Wragg and Francis Douay

**Table S1.** Bioaccessibility values (%; mean  $\pm$  SD;  $n = 3$ ) of metallic elements in BCR-723 obtained through the four lung fluid extractions according to the four solid-to-liquid (S/L) ratios.

| S/L Ratios      | Ba              | Cd              | Co              | Cr             | Cu             | Mn            | Ni             | Pb              | Sr              | Zn             |
|-----------------|-----------------|-----------------|-----------------|----------------|----------------|---------------|----------------|-----------------|-----------------|----------------|
| PBS             |                 |                 |                 |                |                |               |                |                 |                 |                |
| 1/1000          | 0.6 $\pm$ 0.1   | <LD             | 3.6 $\pm$ 3.5   | 0.4 $\pm$ 0.1  | 9.8 $\pm$ 0.8  | 0.1 $\pm$ 0.0 | 2.5 $\pm$ 0.5  | <LD             | 9.0 $\pm$ 0.3   | 1.0 $\pm$ 0.0  |
| 1/2000          | 0.1 $\pm$ 0.0   | <LD             | 8.2 $\pm$ 4.4   | 0.4 $\pm$ 0.0  | 8.9 $\pm$ 2.2  | 0.8 $\pm$ 0.0 | 1.5 $\pm$ 0.3  | <LD             | 20.2 $\pm$ 1.2  | 2.1 $\pm$ 0.2  |
| 1/5000          | 0.5 $\pm$ 0.3   | <LD             | 14.0 $\pm$ 6.0  | 0.8 $\pm$ 0.5  | 4.1 $\pm$ 1.5  | 0.9 $\pm$ 0.0 | <LD            | <LD             | 22.1 $\pm$ 1.2  | 6.8 $\pm$ 0.8  |
| 1/10,000        | 1.1 $\pm$ 0.5   | <LD             | 16.0 $\pm$ 4.0  | 1.6 $\pm$ 1.4  | 1.0 $\pm$ 0.0  | 1.3 $\pm$ 0.1 | <LD            | <LD             | 24.2 $\pm$ 2.2  | 12.6 $\pm$ 0.6 |
| Gamble          |                 |                 |                 |                |                |               |                |                 |                 |                |
| 1/1000          | <LD             | <LD             | 9.8 $\pm$ 0.1   | 0.8 $\pm$ 0.1  | 49.3 $\pm$ 2.1 | 0.5 $\pm$ 0.1 | 6.2 $\pm$ 0.8  | <LD             | 15.7 $\pm$ 0.8  | 2.7 $\pm$ 2.0  |
| 1/2000          | 8.4 $\pm$ 0.3   | <LD             | 11.8 $\pm$ 1.8  | 0.8 $\pm$ 0.3  | 54.4 $\pm$ 3.4 | 1.3 $\pm$ 0.0 | 7.1 $\pm$ 0.4  | 1.7 $\pm$ 0.8   | 18.6 $\pm$ 0.4  | 30.8 $\pm$ 0.3 |
| 1/5000          | 13.6 $\pm$ 0.4  | <LD             | 8.2 $\pm$ 0.0   | 0.5 $\pm$ 0.3  | 49.9 $\pm$ 5.6 | 1.7 $\pm$ 0.0 | 0.8 $\pm$ 0.0  | 7.8 $\pm$ 0.6   | 18.5 $\pm$ 0.4  | 44.6 $\pm$ 0.8 |
| 1/10,000        | 19.8 $\pm$ 6.3  | <LD             | <LD             | 0.5 $\pm$ 0.1  | 56.3 $\pm$ 4.9 | 2.8 $\pm$ 0.7 | 5.9 $\pm$ 0.0  | 12.3 $\pm$ 3.6  | 19.8 $\pm$ 0.1  | 57.7 $\pm$ 0.8 |
| Modified Gamble |                 |                 |                 |                |                |               |                |                 |                 |                |
| 1/1000          | 1.0 $\pm$ 0.3   | 26.5 $\pm$ 1.9  | 16.0 $\pm$ 4.9  | 1.3 $\pm$ 0.8  | 51.5 $\pm$ 0.7 | 0.4 $\pm$ 0.1 | 6.7 $\pm$ 1.0  | 1.0 $\pm$ 0.5   | 28.5 $\pm$ 2.2  | 3.0 $\pm$ 1.7  |
| 1/2000          | 7.7 $\pm$ 3.5   | 17.1 $\pm$ 15.4 | 22.1 $\pm$ 3.9  | 1.2 $\pm$ 0.2  | 51.7 $\pm$ 5.4 | 1.2 $\pm$ 0.2 | 6.3 $\pm$ 0.8  | 3.8 $\pm$ 2.2   | 45.8 $\pm$ 1.7  | 27.2 $\pm$ 5.9 |
| 1/5000          | 16.2 $\pm$ 4.5  | 79.4 $\pm$ 14.4 | 24.9 $\pm$ 6.4  | 0.9 $\pm$ 0.8  | 51.4 $\pm$ 7.2 | 1.8 $\pm$ 0.1 | 1.1 $\pm$ 0.0  | 11.9 $\pm$ 4.8  | 66.7 $\pm$ 18.6 | 42.0 $\pm$ 6.3 |
| 1/10,000        | 21.9 $\pm$ 2.3  | 95.0 $\pm$ 0.1  | 29.6 $\pm$ 7.4  | 1.9 $\pm$ 0.7  | 63.0 $\pm$ 5.1 | 2.0 $\pm$ 0.0 | <LD            | 22.1 $\pm$ 11.4 | 85.5 $\pm$ 3.6  | 53.9 $\pm$ 1.5 |
| ALF             |                 |                 |                 |                |                |               |                |                 |                 |                |
| 1/1000          | 42.0 $\pm$ 13.7 | 75.4 $\pm$ 10.2 | 52.0 $\pm$ 16.8 | 12.4 $\pm$ 4.6 | 71.1 $\pm$ 8.8 | 5.5 $\pm$ 0.2 | 34.8 $\pm$ 2.3 | 67.2 $\pm$ 1.8  | 50.7 $\pm$ 1.8  | 77.8 $\pm$ 1.8 |
| 1/2000          | 47.5 $\pm$ 19.8 | 77.4 $\pm$ 8.0  | 59.7 $\pm$ 27.2 | 12.7 $\pm$ 5.9 | 75.6 $\pm$ 4.3 | 5.6 $\pm$ 0.0 | 33.8 $\pm$ 0.5 | 66.4 $\pm$ 0.4  | 52.8 $\pm$ 0.3  | 79.2 $\pm$ 0.8 |
| 1/5000          | 35.7 $\pm$ 0.5  | 81.4 $\pm$ 7.6  | 39.8 $\pm$ 15.3 | 8.7 $\pm$ 0.0  | 65.2 $\pm$ 3.7 | 5.5 $\pm$ 0.1 | 24.1 $\pm$ 3.7 | 62.0 $\pm$ 3.2  | 56.2 $\pm$ 3.2  | 76.8 $\pm$ 2.2 |
| 1/10,000        | 39.0 $\pm$ 0.1  | 74.4 $\pm$ 3.0  | 51.8 $\pm$ 0.1  | 8.3 $\pm$ 0.1  | 75.8 $\pm$ 0.1 | 5.6 $\pm$ 0.0 | 47.3 $\pm$ 0.1 | 59.7 $\pm$ 0.1  | 63.5 $\pm$ 0.1  | 74.9 $\pm$ 0.1 |

LD: Limit of detection; PBS: phosphate-buffered saline; ALF: artificial lysosomal fluid.

**Table S2.** Bioaccessibility values (%; mean  $\pm$  SD;  $n = 3$ ) of metallic elements in NIST 2710a obtained through the four lung fluid extractions according to the four S/L ratios.

| S/L Ratios      | Ba             | Cd              | Co              | Cr            | Cu             | Mn              | Ni  | Pb              | Sr             | Zn             |
|-----------------|----------------|-----------------|-----------------|---------------|----------------|-----------------|-----|-----------------|----------------|----------------|
| PBS             |                |                 |                 |               |                |                 |     |                 |                |                |
| 1/1000          | <LD            | 28.9 $\pm$ 10.3 | 5.9 $\pm$ 1.7   | <LD           | 3.4 $\pm$ 0.4  | 21.6 $\pm$ 3.0  | <LD | <LD             | 0.2 $\pm$ 0.0  | 2.1 $\pm$ 0.3  |
| 1/2000          | <LD            | 43.8 $\pm$ 6.4  | 27.5 $\pm$ 12.5 | 1.4 $\pm$ 1.0 | 5.9 $\pm$ 0.1  | 31.9 $\pm$ 1.2  | <LD | 0.2 $\pm$ 0.0   | 3.3 $\pm$ 0.1  | 4.1 $\pm$ 0.4  |
| 1/5000          | <LD            | 44.2 $\pm$ 21.2 | 95.1 $\pm$ 52.7 | 7.8 $\pm$ 0.0 | 8.3 $\pm$ 0.2  | 28.7 $\pm$ 0.4  | <LD | 0.04 $\pm$ 0.00 | 2.8 $\pm$ 0.0  | 6.2 $\pm$ 0.1  |
| 1/10,000        | <LD            | 69.7 $\pm$ 11.5 | 61.9 $\pm$ 0.1  | 5.5 $\pm$ 0.0 | 11.7 $\pm$ 3.6 | 33.1 $\pm$ 8.8  | <LD | 0.1 $\pm$ 0.1   | <LD            | 8.6 $\pm$ 2.0  |
| Gamble          |                |                 |                 |               |                |                 |     |                 |                |                |
| 1/1000          | <LD            | 56.8 $\pm$ 9.0  | <LD             | <LD           | 55.3 $\pm$ 4.2 | 33.0 $\pm$ 2.3  | <LD | 2.3 $\pm$ 0.3   | 1.3 $\pm$ 0.6  | 13.7 $\pm$ 2.2 |
| 1/2000          | <LD            | 61.9 $\pm$ 10.4 | <LD             | <LD           | 52.1 $\pm$ 3.0 | 37.3 $\pm$ 1.8  | <LD | 3.7 $\pm$ 0.2   | 0.8 $\pm$ 0.0  | 18.0 $\pm$ 0.9 |
| 1/5000          | <LD            | 86.0 $\pm$ 2.8  | <LD             | <LD           | 47.6 $\pm$ 1.4 | 40.1 $\pm$ 0.7  | <LD | 7.9 $\pm$ 0.4   | 0.8 $\pm$ 0.2  | 23.7 $\pm$ 0.1 |
| 1/10,000        | <LD            | 82.7 $\pm$ 16.1 | <LD             | <LD           | 62.4 $\pm$ 1.4 | 56.9 $\pm$ 12.5 | <LD | 12.5 $\pm$ 0.6  | 1.4 $\pm$ 0.1  | 34.0 $\pm$ 6.8 |
| Modified Gamble |                |                 |                 |               |                |                 |     |                 |                |                |
| 1/1000          | 0.1 $\pm$ 0.0  | 76.1 $\pm$ 2.4  | 22.9 $\pm$ 23.4 | <LD           | 49.4 $\pm$ 2.9 | 31.8 $\pm$ 1.7  | <LD | 2.2 $\pm$ 0.1   | 7.0 $\pm$ 0.3  | 13.2 $\pm$ 1.0 |
| 1/2000          | 0.3 $\pm$ 0.1  | 77.3 $\pm$ 0.1  | 32.5 $\pm$ 0.1  | <LD           | 47.4 $\pm$ 2.0 | 36.6 $\pm$ 1.6  | <LD | 3.8 $\pm$ 0.1   | 13.9 $\pm$ 1.4 | 18.6 $\pm$ 0.4 |
| 1/5000          | 1.0 $\pm$ 0.0  | 97.2 $\pm$ 11.7 | 47.5 $\pm$ 0.1  | <LD           | 39.4 $\pm$ 2.2 | 41.3 $\pm$ 2.0  | <LD | 7.1 $\pm$ 1.5   | 35.0 $\pm$ 1.1 | 25.5 $\pm$ 0.4 |
| 1/10,000        | 1.4 $\pm$ 2.0  | 88.1 $\pm$ 0.1  | 55.6 $\pm$ 25.8 | <LD           | 36.9 $\pm$ 4.9 | 40.9 $\pm$ 2.2  | <LD | 11.8 $\pm$ 1.1  | 46.7 $\pm$ 5.8 | 25.9 $\pm$ 4.2 |
| ALF             |                |                 |                 |               |                |                 |     |                 |                |                |
| 1/1000          | 23.2 $\pm$ 0.4 | 94.4 $\pm$ 5.1  | 22.2 $\pm$ 9.3  | <LD           | 62.0 $\pm$ 0.6 | 43.4 $\pm$ 1.6  | <LD | 51.4 $\pm$ 1.1  | 2.9 $\pm$ 0.3  | 36.7 $\pm$ 1.6 |
| 1/2000          | 24.9 $\pm$ 0.9 | 93.5 $\pm$ 5.8  | 32.3 $\pm$ 22.9 | <LD           | 61.2 $\pm$ 1.8 | 43.1 $\pm$ 1.2  | <LD | 55.0 $\pm$ 1.4  | 2.6 $\pm$ 0.5  | 36.1 $\pm$ 0.7 |
| 1/5000          | 25.3 $\pm$ 0.4 | 85.3 $\pm$ 8.4  | 35.1 $\pm$ 0.0  | <LD           | 59.7 $\pm$ 1.4 | 44.3 $\pm$ 0.2  | <LD | 55.0 $\pm$ 0.5  | 2.3 $\pm$ 0.5  | 35.3 $\pm$ 0.1 |
| 1/10,000        | 26.8 $\pm$ 0.0 | 89.4 $\pm$ 0.1  | 36.5 $\pm$ 0.1  | <LD           | 61.8 $\pm$ 0.3 | 45.7 $\pm$ 0.1  | <LD | 56.1 $\pm$ 0.1  | 3.1 $\pm$ 0.1  | 35.9 $\pm$ 0.1 |

**Table S3.** Bioaccessibility values (%; mean  $\pm$  SD;  $n = 3$ ) of metallic elements in NIST 1648a obtained through the four lung fluid extractions according to the four S/L ratios.

| S/L Ratios      | Ba             | Cd              | Co              | Cr            | Cu              | Mn             | Ni             | Pb             | Sr              | Zn             |
|-----------------|----------------|-----------------|-----------------|---------------|-----------------|----------------|----------------|----------------|-----------------|----------------|
| PBS             |                |                 |                 |               |                 |                |                |                |                 |                |
| 1/1000          | <LD            | 9.1 $\pm$ 0.5   | 9.5 $\pm$ 3.7   | 0.4 $\pm$ 0.1 | 9.6 $\pm$ 0.4   | 7.4 $\pm$ 0.3  | 6.6 $\pm$ 1.8  | <LD            | 14.1 $\pm$ 0.5  | 0.7 $\pm$ 0.0  |
| 1/2000          | <LD            | 15.4 $\pm$ 1.5  | 8.2 $\pm$ 0.9   | 0.6 $\pm$ 0.3 | 11.4 $\pm$ 1.0  | 13.5 $\pm$ 0.5 | 5.6 $\pm$ 2.6  | <LD            | 16.5 $\pm$ 0.6  | 2.0 $\pm$ 0.1  |
| 1/5000          | <LD            | 24.1 $\pm$ 6.2  | 3.3 $\pm$ 0.0   | 1.3 $\pm$ 0.4 | 7.3 $\pm$ 1.8   | 16.4 $\pm$ 1.4 | <LD            | <LD            | 29.0 $\pm$ 23.8 | 4.3 $\pm$ 0.2  |
| 1/10,000        | <LD            | 29.6 $\pm$ 1.2  | 8.9 $\pm$ 0.1   | 1.8 $\pm$ 0.3 | 8.4 $\pm$ 4.5   | 23.0 $\pm$ 0.9 | <LD            | <LD            | 32.1 $\pm$ 2.2  | 7.1 $\pm$ 0.1  |
| Gamble          |                |                 |                 |               |                 |                |                |                |                 |                |
| 1/1000          | <LD            | 11.0 $\pm$ 2.0  | 16.5 $\pm$ 5.9  | 1.4 $\pm$ 0.4 | 52.0 $\pm$ 13.2 | 8.5 $\pm$ 2.8  | 26.7 $\pm$ 8.8 | 0.4 $\pm$ 0.1  | 15.8 $\pm$ 0.7  | 4.3 $\pm$ 1.3  |
| 1/2000          | <LD            | 34.2 $\pm$ 7.5  | 17.4 $\pm$ 4.0  | 1.8 $\pm$ 0.5 | 51.9 $\pm$ 6.1  | 23.4 $\pm$ 2.4 | 18.9 $\pm$ 0.9 | 2.6 $\pm$ 0.1  | 32.0 $\pm$ 9.2  | 25.4 $\pm$ 0.4 |
| 1/5000          | <LD            | 45.2 $\pm$ 4.0  | 38.8 $\pm$ 4.3  | 2.7 $\pm$ 1.0 | 49.9 $\pm$ 2.7  | 29.6 $\pm$ 0.2 | 3.3 $\pm$ 1.2  | 9.1 $\pm$ 0.9  | 31.5 $\pm$ 0.9  | 43.2 $\pm$ 0.2 |
| 1/10,000        | <LD            | 49.7 $\pm$ 2.1  | 56.7 $\pm$ 2.0  | 3.7 $\pm$ 0.0 | 45.7 $\pm$ 11.6 | 29.4 $\pm$ 5.4 | <LD            | 16.3 $\pm$ 0.4 | 37.4 $\pm$ 0.1  | 49.2 $\pm$ 6.9 |
| Modified Gamble |                |                 |                 |               |                 |                |                |                |                 |                |
| 1/1000          | 0.1 $\pm$ 0.0  | 15.2 $\pm$ 0.4  | 26.7 $\pm$ 5.4  | 1.4 $\pm$ 0.1 | 46.0 $\pm$ 2.7  | 12.2 $\pm$ 0.6 | 22.2 $\pm$ 2.1 | 0.9 $\pm$ 0.1  | 28.2 $\pm$ 2.5  | 7.0 $\pm$ 0.5  |
| 1/2000          | 0.4 $\pm$ 0.1  | 33.2 $\pm$ 1.8  | 34.9 $\pm$ 11.9 | 1.9 $\pm$ 0.5 | 48.4 $\pm$ 1.7  | 22.4 $\pm$ 0.6 | 18.2 $\pm$ 3.6 | 3.1 $\pm$ 0.0  | 40.9 $\pm$ 1.7  | 27.3 $\pm$ 0.4 |
| 1/5000          | 2.4 $\pm$ 0.5  | 50.7 $\pm$ 3.1  | 56.5 $\pm$ 6.9  | 2.4 $\pm$ 0.2 | 44.0 $\pm$ 0.4  | 28.1 $\pm$ 0.8 | <LD            | 11.2 $\pm$ 0.5 | 68.9 $\pm$ 1.4  | 43.0 $\pm$ 1.2 |
| 1/10,000        | 2.3 $\pm$ 0.3  | 64.9 $\pm$ 16.0 | 74.8 $\pm$ 8.5  | 2.5 $\pm$ 0.9 | 53.3 $\pm$ 4.7  | 33.4 $\pm$ 1.4 | <LD            | 16.3 $\pm$ 3.9 | 41.9 $\pm$ 1.2  | 55.3 $\pm$ 3.5 |
| ALF             |                |                 |                 |               |                 |                |                |                |                 |                |
| 1/1000          | 38.9 $\pm$ 1.2 | 69.9 $\pm$ 2.0  | 33.9 $\pm$ 2.1  | 8.9 $\pm$ 0.5 | 57.5 $\pm$ 1.6  | 45.9 $\pm$ 0.6 | 30.9 $\pm$ 1.8 | 74.0 $\pm$ 2.8 | 51.0 $\pm$ 3.6  | 67.4 $\pm$ 2.1 |
| 1/2000          | 46.7 $\pm$ 1.8 | 68.4 $\pm$ 3.8  | 40.6 $\pm$ 9.6  | 8.5 $\pm$ 0.6 | 52.6 $\pm$ 3.7  | 45.2 $\pm$ 2.5 | 25.2 $\pm$ 5.7 | 72.3 $\pm$ 2.6 | 49.9 $\pm$ 4.1  | 65.7 $\pm$ 2.8 |
| 1/5000          | 52.8 $\pm$ 1.9 | 65.6 $\pm$ 5.5  | 35.0 $\pm$ 16.5 | 8.7 $\pm$ 0.9 | 55.0 $\pm$ 1.1  | 46.8 $\pm$ 2.6 | 12.2 $\pm$ 4.1 | 75.9 $\pm$ 2.2 | 50.9 $\pm$ 3.2  | 66.2 $\pm$ 2.3 |
| 1/10,000        | 52.7 $\pm$ 1.9 | 72.2 $\pm$ 6.4  | 52.9 $\pm$ 45.1 | 7.0 $\pm$ 0.9 | 52.7 $\pm$ 3.1  | 46.1 $\pm$ 1.3 | <LD            | 76.0 $\pm$ 2.3 | 52.8 $\pm$ 2.7  | 66.1 $\pm$ 1.9 |

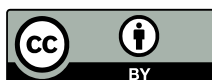

© 2017 by the authors; licensee MDPI, Basel, Switzerland. This article is an open access article distributed under the terms and conditions of the Creative Commons by Attribution (CC-BY) license (<http://creativecommons.org/licenses/by/4.0/>).
